# Supplementary material
Source: publisher figshare collection journal article supplement (https://springernature.figshare.com/ndownloader/files/14014064)
Supplement: Supplementary file [file 14014064]

A+N\*

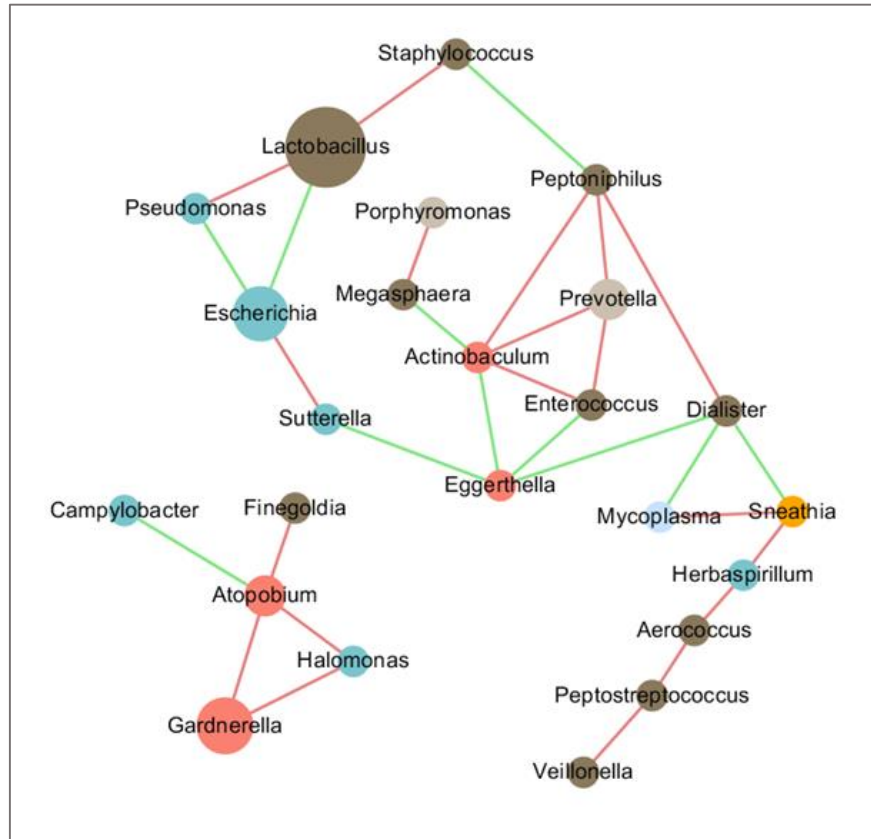

**Figure S7 Correlation network of vaginal microbiota in the A+N\* group.** The figure shows the correlation network using SparCC correlation coefficients at genus level. The nodes represent bacteria genera, and the node size represents the relative abundance. An edge is colored green for a negative correlation and red for a positive correlation.
